# Supplementary material for: Peripheral Blood Cells from Patients with Autoimmune Addison's Disease Poorly Respond to Interferons In Vitro, Despite Elevated Serum Levels of Interferon-Inducible Chemokines
Source: PubMed Central journal article supplement (PMC4589105; doi:10.1089/jir.2014.0171), 2015-10-01
Supplement: Supp_Fig1.pdf [file Supp_Fig1.pdf]

## Supplementary Data

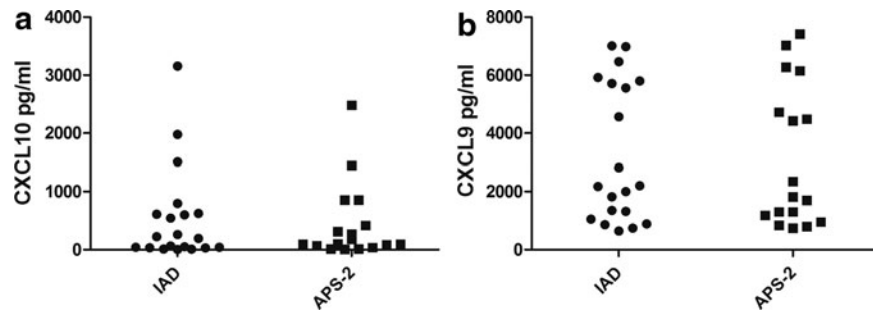

**SUPPLEMENTARY FIG. S1.** Variations in plasma and serum levels of CXCL10 (a) and CXCL9 (b) as seen in Fig. 1, stratified between patients with isolated Addison's disease (IAD) and patients with autoimmune polyendocrine syndrome type 2 (APS-2). Nonparametric Mann–Whitney *U*-test was used to test for statistical differences between the 2 groups, but none were found.
