# Supplementary material for: Peripheral Blood Cells from Patients with Autoimmune Addison's Disease Poorly Respond to Interferons In Vitro, Despite Elevated Serum Levels of Interferon-Inducible Chemokines
Source: PubMed Central journal article supplement (PMC4589105; doi:10.1089/jir.2014.0171), 2015-10-01
Supplement: Supp_Fig2.pdf [file Supp_Fig2.pdf]

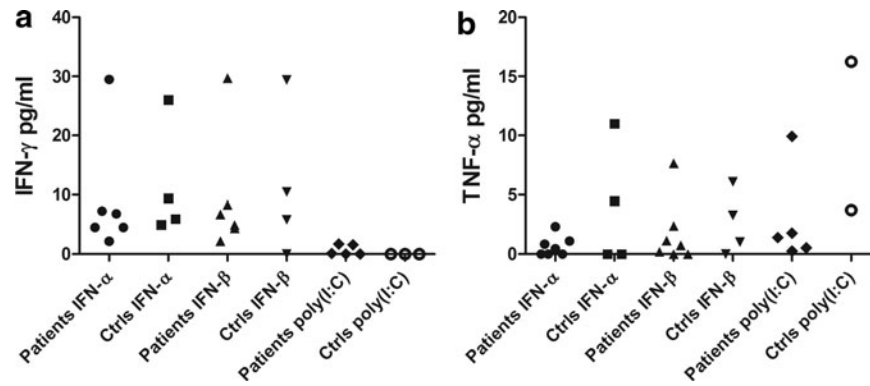

**SUPPLEMENTARY FIG. S2.** Production of IFN- $\gamma$  (a) and TNF- $\alpha$  (b) in PBMC stimulated with type I IFNs and poly (I:C) in patients (IFN- $\gamma$ : IFN- $\alpha$ ,  $n=6$ ; IFN- $\beta$ ,  $n=6$ ; poly (I:C),  $n=5$ . TNF- $\alpha$ : IFN- $\alpha$ ,  $n=7$ ; IFN- $\beta$ ,  $n=7$ ; poly (I:C),  $n=5$ ) and controls (IFN- $\gamma$ : IFN- $\alpha$ ,  $n=4$ ; IFN- $\beta$ ,  $n=4$ ; poly (I:C),  $n=3$ . TNF- $\alpha$ : IFN- $\alpha$ ,  $n=4$ ; IFN- $\beta$ ,  $n=4$ ; poly (I:C),  $n=2$ ). Non-parametric Mann-Whitney  $U$ -test was used to test for statistical differences between patients and controls, but none were found. For poly (I:C) there were too few data points to do calculations. IFN, interferon; PBMC, peripheral blood mononuclear cell.
