# Supplementary material for: Peripheral Blood Cells from Patients with Autoimmune Addison's Disease Poorly Respond to Interferons In Vitro, Despite Elevated Serum Levels of Interferon-Inducible Chemokines
Source: PubMed Central journal article supplement (PMC4589105; doi:10.1089/jir.2014.0171), 2015-10-01
Supplement: Supp_Fig3.pdf [file Supp_Fig3.pdf]

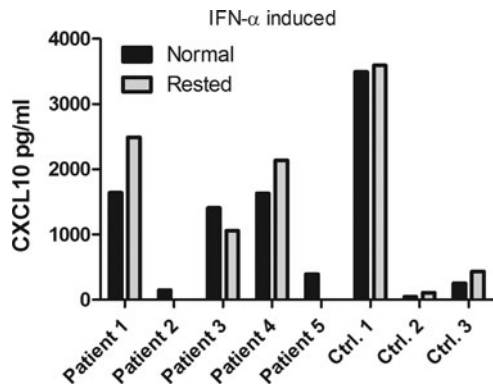

**SUPPLEMENTARY FIG. S3.** Variations in CXCL10 production in cells stimulated with IFN- $\alpha$  (patients,  $n=5$  and controls,  $n=3$ ) directly after recovery from cryopreservation (as shown in Fig. 2) or after a resting period of 24 h.
