# Supplementary material for: Peripheral Blood Cells from Patients with Autoimmune Addison's Disease Poorly Respond to Interferons In Vitro, Despite Elevated Serum Levels of Interferon-Inducible Chemokines
Source: PubMed Central journal article supplement (PMC4589105; doi:10.1089/jir.2014.0171), 2015-10-01
Supplement: Supp_Fig6.pdf [file Supp_Fig6.pdf]

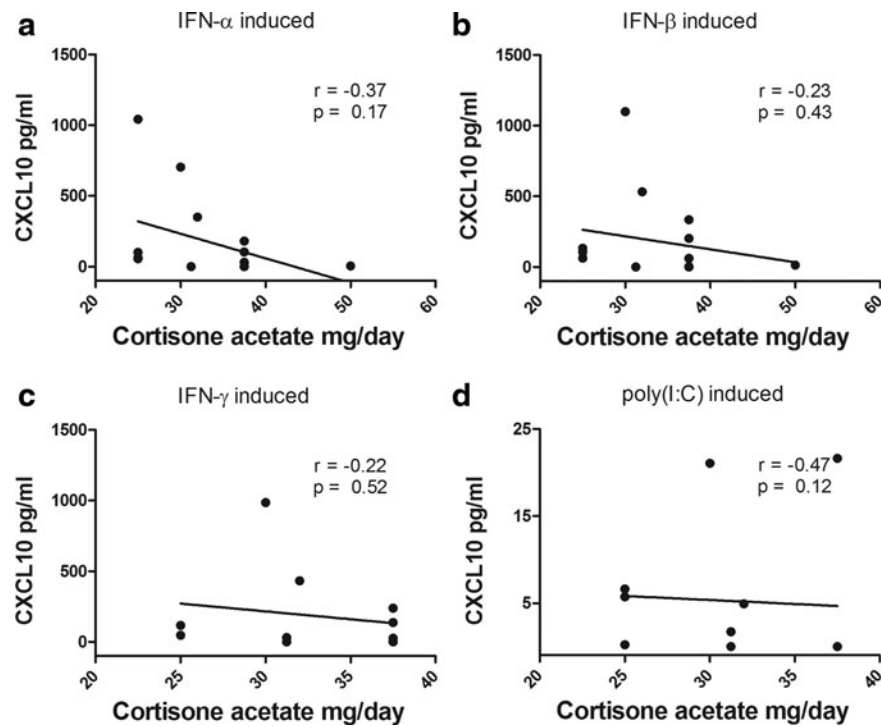

**SUPPLEMENTARY FIG. S6.** Correlation between CXCL10 production and glucocorticoid treatment in IFN- (a–c) and poly (I:C) (d)-induced PBMC from patients as seen in Figs. 2 and 4. Nonparametric Spearman’s rank was used to test for statistical correlations, but none were found.
