# Supplementary material for: Peripheral Blood Cells from Patients with Autoimmune Addison's Disease Poorly Respond to Interferons In Vitro, Despite Elevated Serum Levels of Interferon-Inducible Chemokines
Source: PubMed Central journal article supplement (PMC4589105; doi:10.1089/jir.2014.0171), 2015-10-01
Supplement: Supp_Fig10.pdf [file Supp_Fig10.pdf]

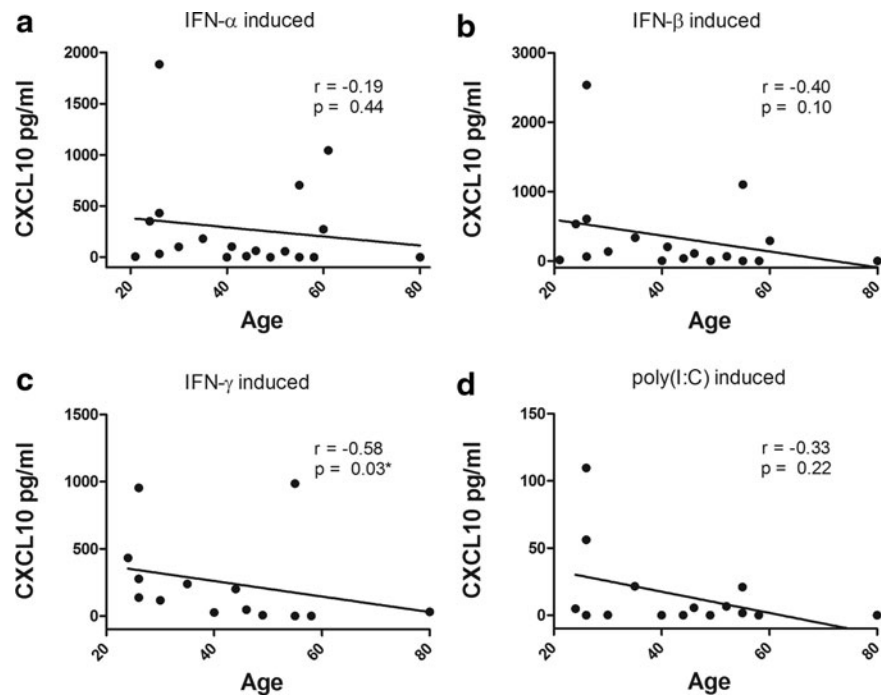

**SUPPLEMENTARY FIG. S10.** Correlation between CXCL10 production and age in IFN- (**a–c**) and poly (I:C) (**d**)-induced PBMC from patients as seen in Figs. 2 and 4. Nonparametric Spearman’s rank was used to test for statistical correlations (\* $P < 0.05$ ).
