# Supplementary material for: Peripheral Blood Cells from Patients with Autoimmune Addison's Disease Poorly Respond to Interferons In Vitro, Despite Elevated Serum Levels of Interferon-Inducible Chemokines
Source: PubMed Central journal article supplement (PMC4589105; doi:10.1089/jir.2014.0171), 2015-10-01
Supplement: Supp_Fig12.pdf [file Supp_Fig12.pdf]

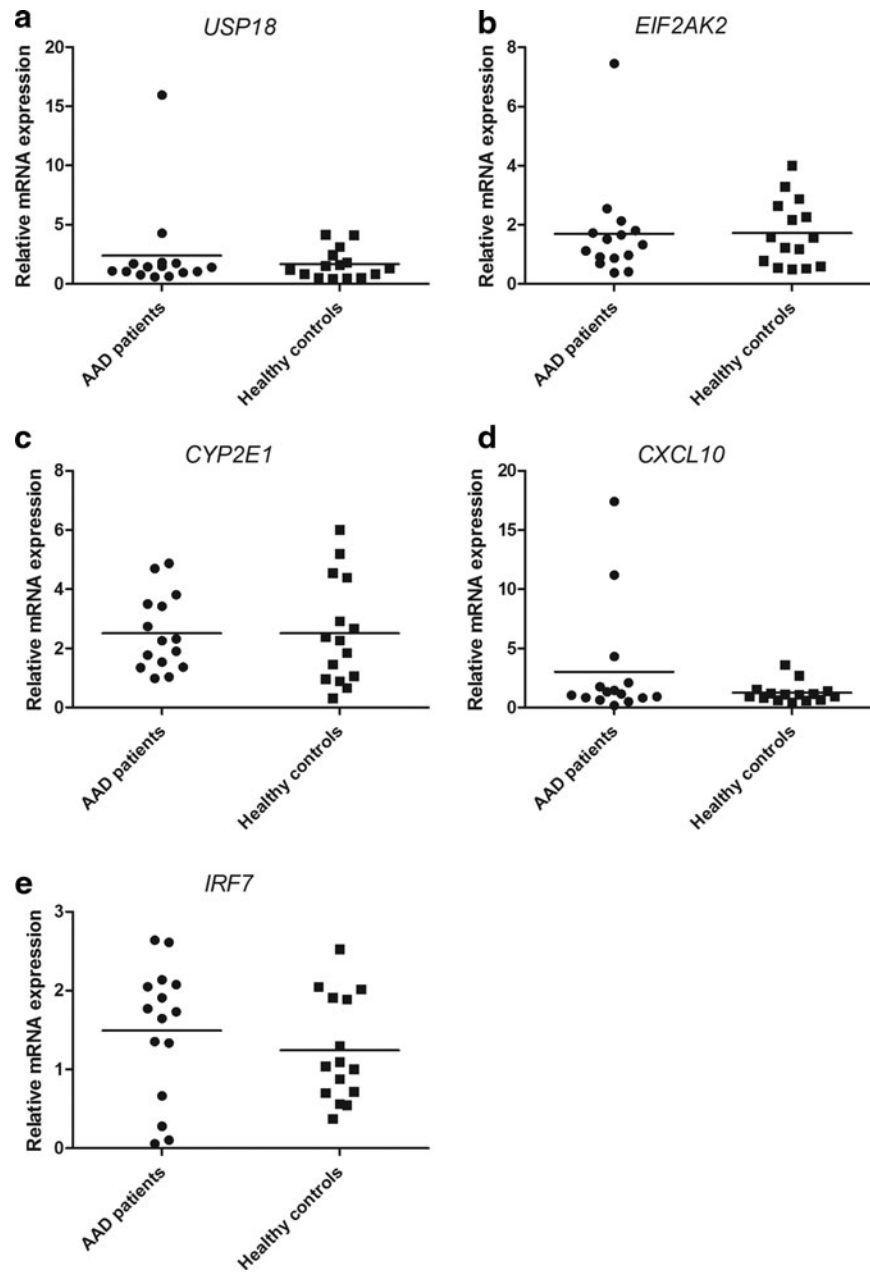

**SUPPLEMENTARY FIG. S12.** Real-time qPCR was used to determine the relative mRNA expression of 5 selected ISGs (**a–e**) in isolated CD4<sup>+</sup> T cells from AAD patients ( $n=15$ ) and healthy controls ( $n=15$ ). The results for each patient and control are displayed as means of triplicates and the bars display the mean for the whole group. Nonparametric Mann–Whitney  $U$ -test was used to test for statistical differences between patients and controls, but none were found. AAD, autoimmune Addison’s disease; ISGs, interferon-stimulated genes; qPCR, quantitative real-time polymerase chain reaction.
