# Supplementary material for: Peripheral Blood Cells from Patients with Autoimmune Addison's Disease Poorly Respond to Interferons In Vitro, Despite Elevated Serum Levels of Interferon-Inducible Chemokines
Source: PubMed Central journal article supplement (PMC4589105; doi:10.1089/jir.2014.0171), 2015-10-01
Supplement: Supp_Fig14.pdf [file Supp_Fig14.pdf]

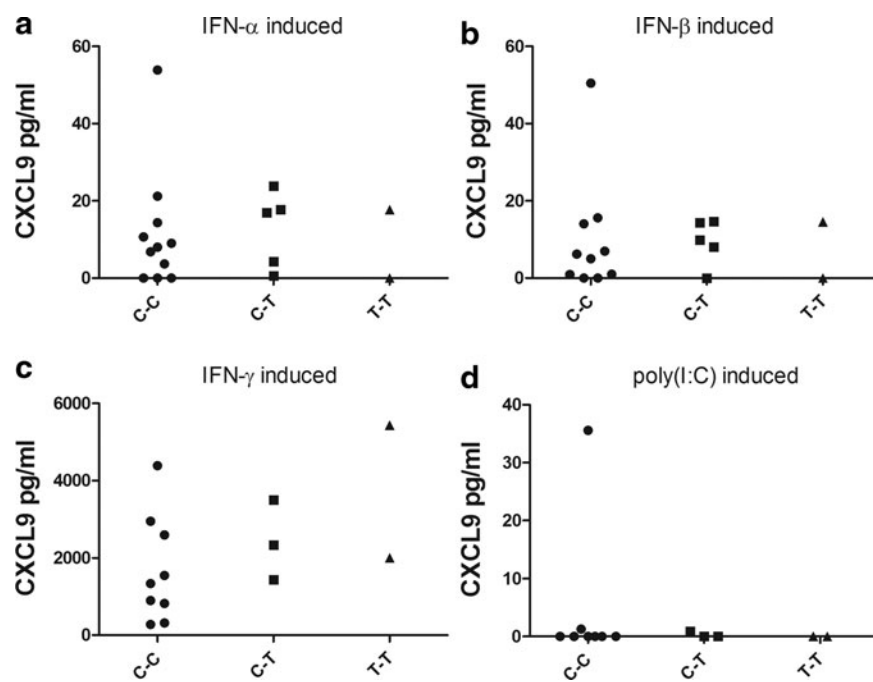

**SUPPLEMENTARY FIG. S14.** Variations in IFN- (a-c) and poly (I:C) (d)-induced CXCL9 production as seen in Figs. 2 and 4 stratified between patients with the 3 different PTPN22 1858 genotypes.
