# Supplementary material for: Peripheral Blood Cells from Patients with Autoimmune Addison's Disease Poorly Respond to Interferons In Vitro, Despite Elevated Serum Levels of Interferon-Inducible Chemokines
Source: J Interferon Cytokine Res. 2015 Oct 1;35(10):759–70. doi: 10.1089/jir.2014.0171 (PMC4589105; doi:10.1089/jir.2014.0171)
Supplement: Supplemental data [file Supp_Fig5.pdf]

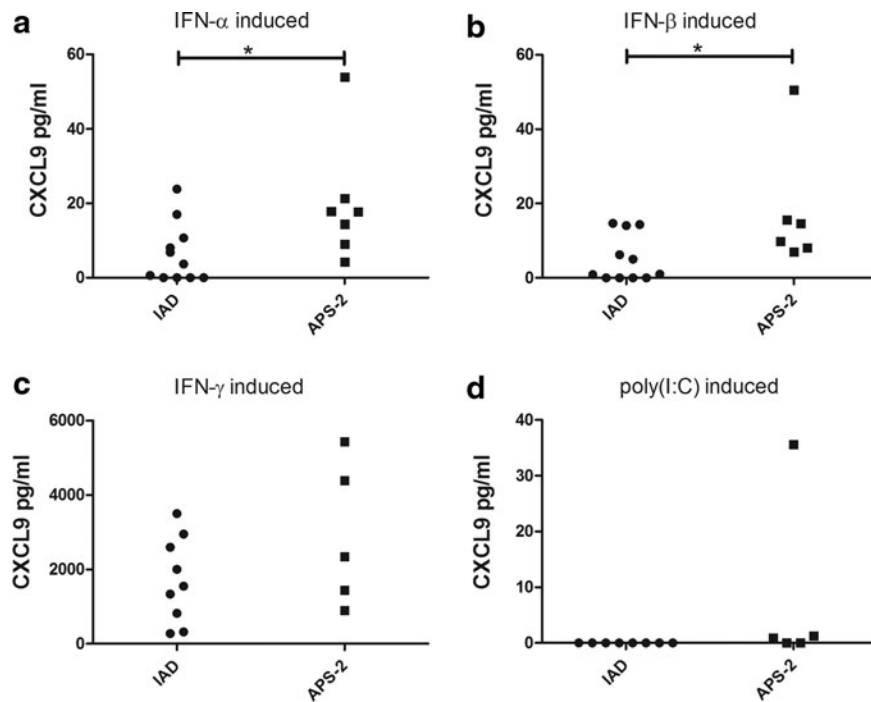

**SUPPLEMENTARY FIG. S5.** Variations in IFN- (a–c) and poly (I:C) (d)-induced CXCL9 production as seen in Figs. 2 and 4, stratified between patients with IAD and patients with APS-2. Nonparametric Mann–Whitney *U*-test was used to test for statistical differences between the 2 groups (\* $P < 0.05$ ).
